# Supplementary material
Source: publisher figshare collection journal article supplement (https://frontiersin.figshare.com/ndownloader/files/21611253)

2-cell\_Zygote\_Up\_BP

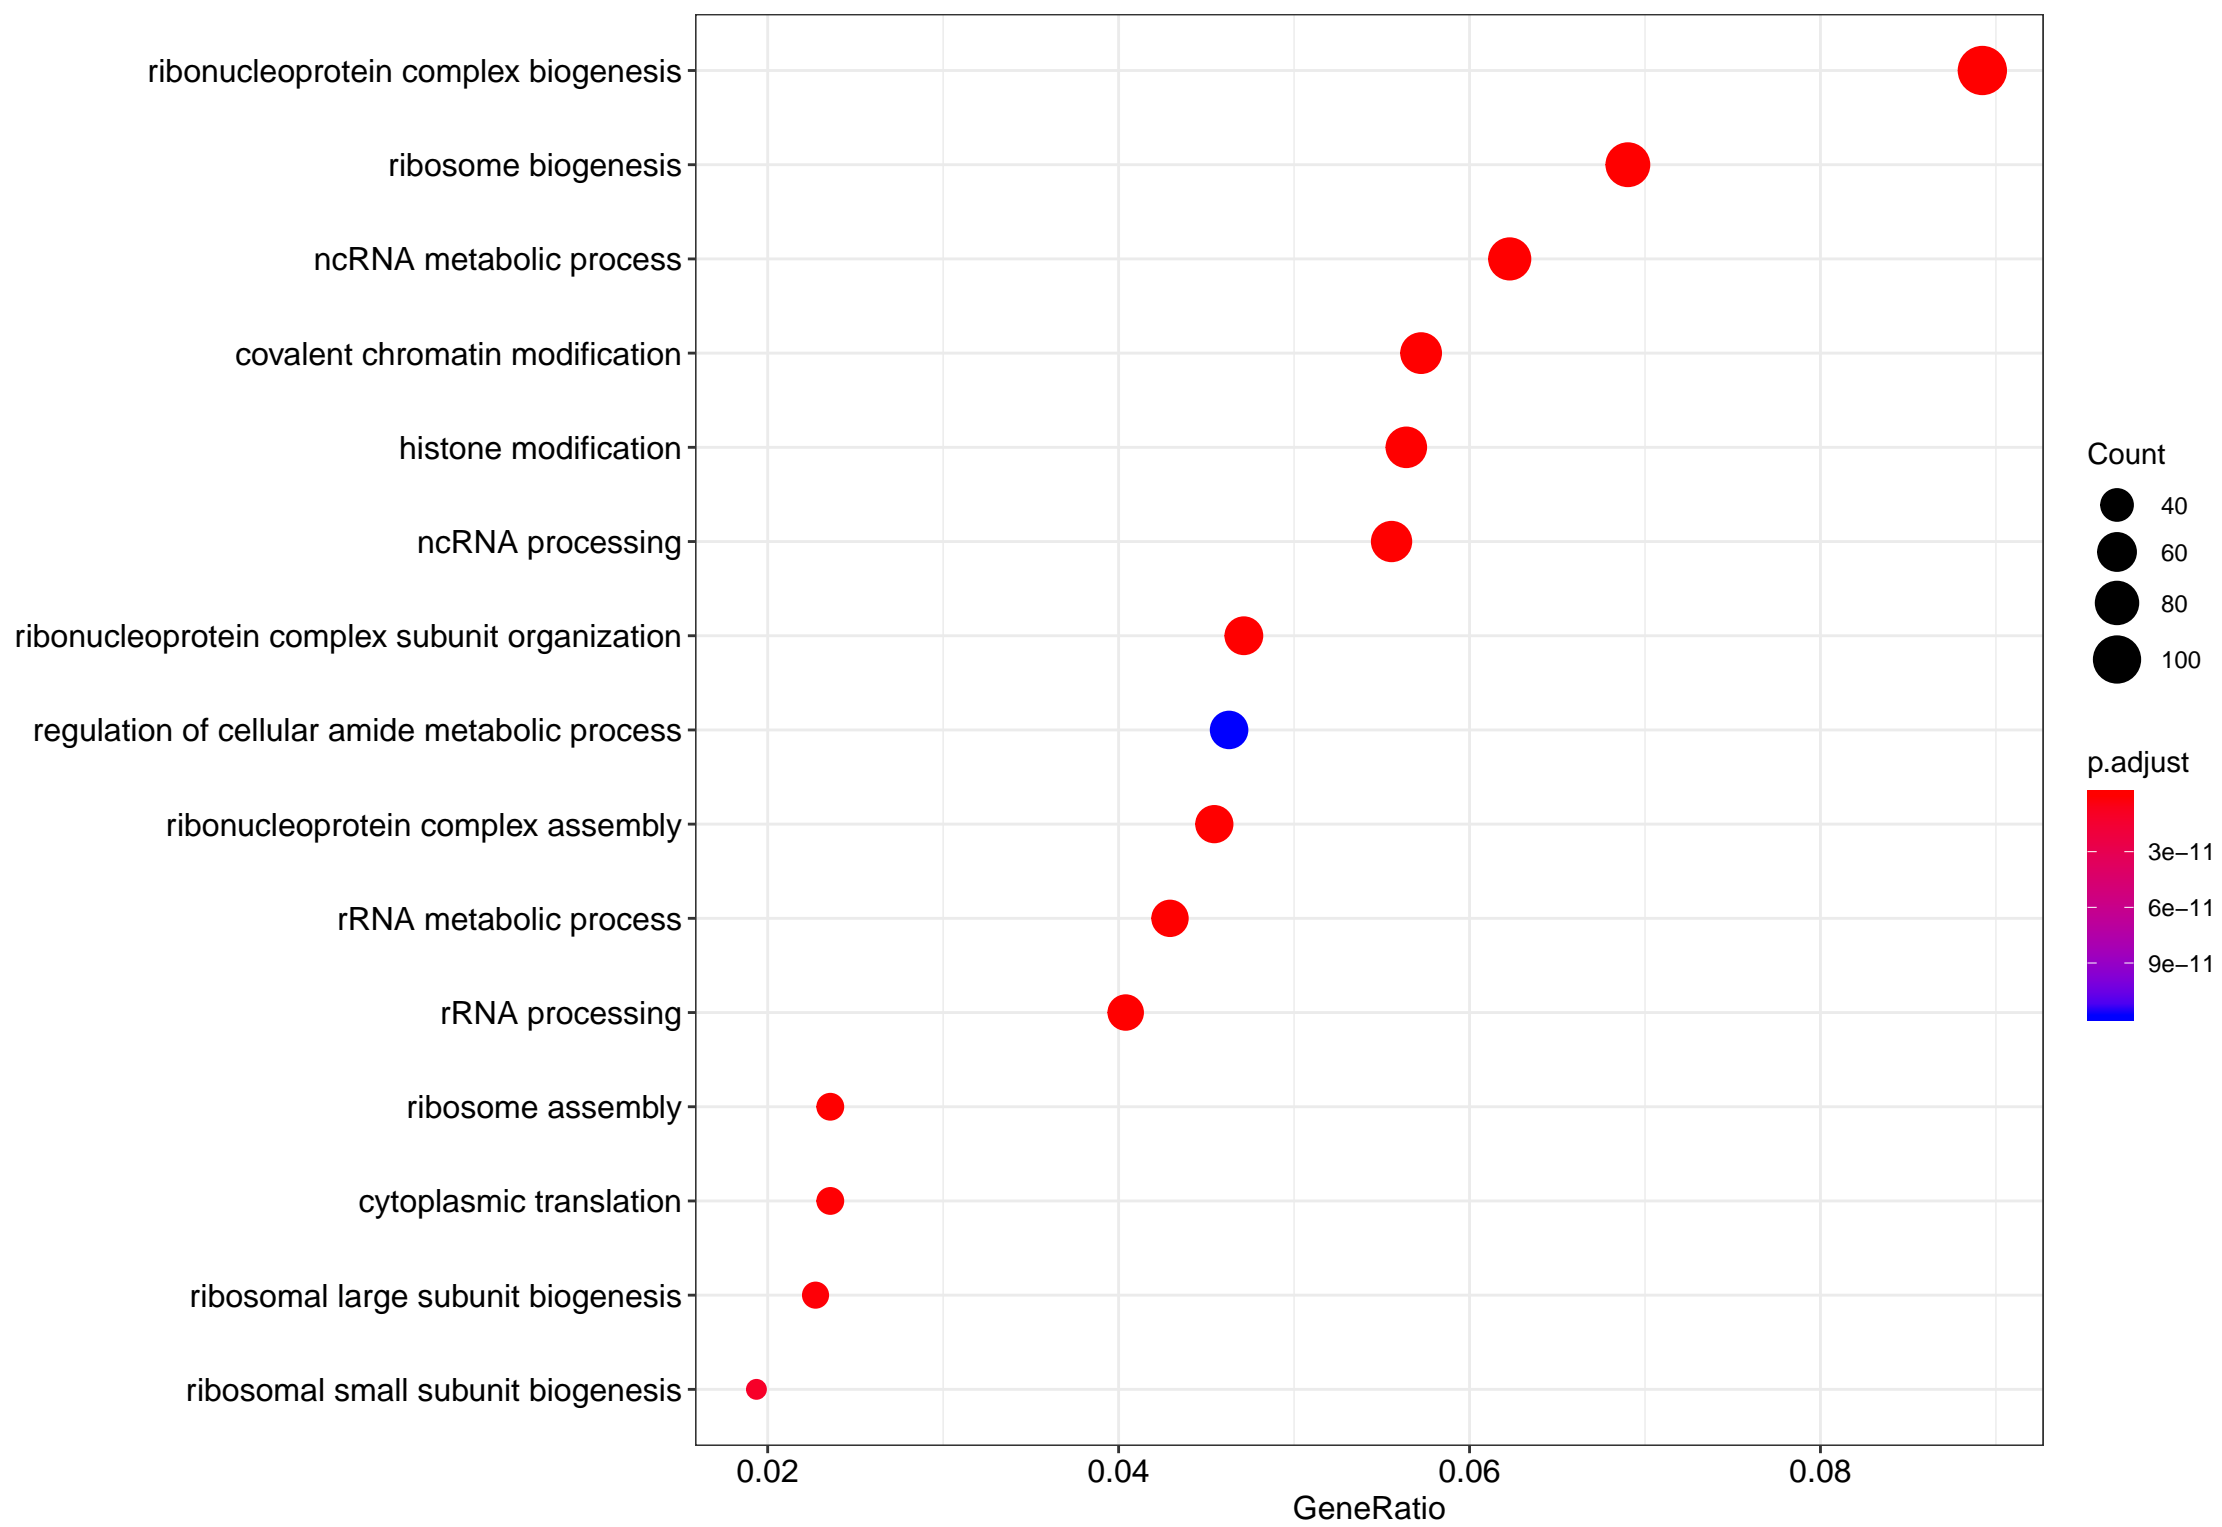

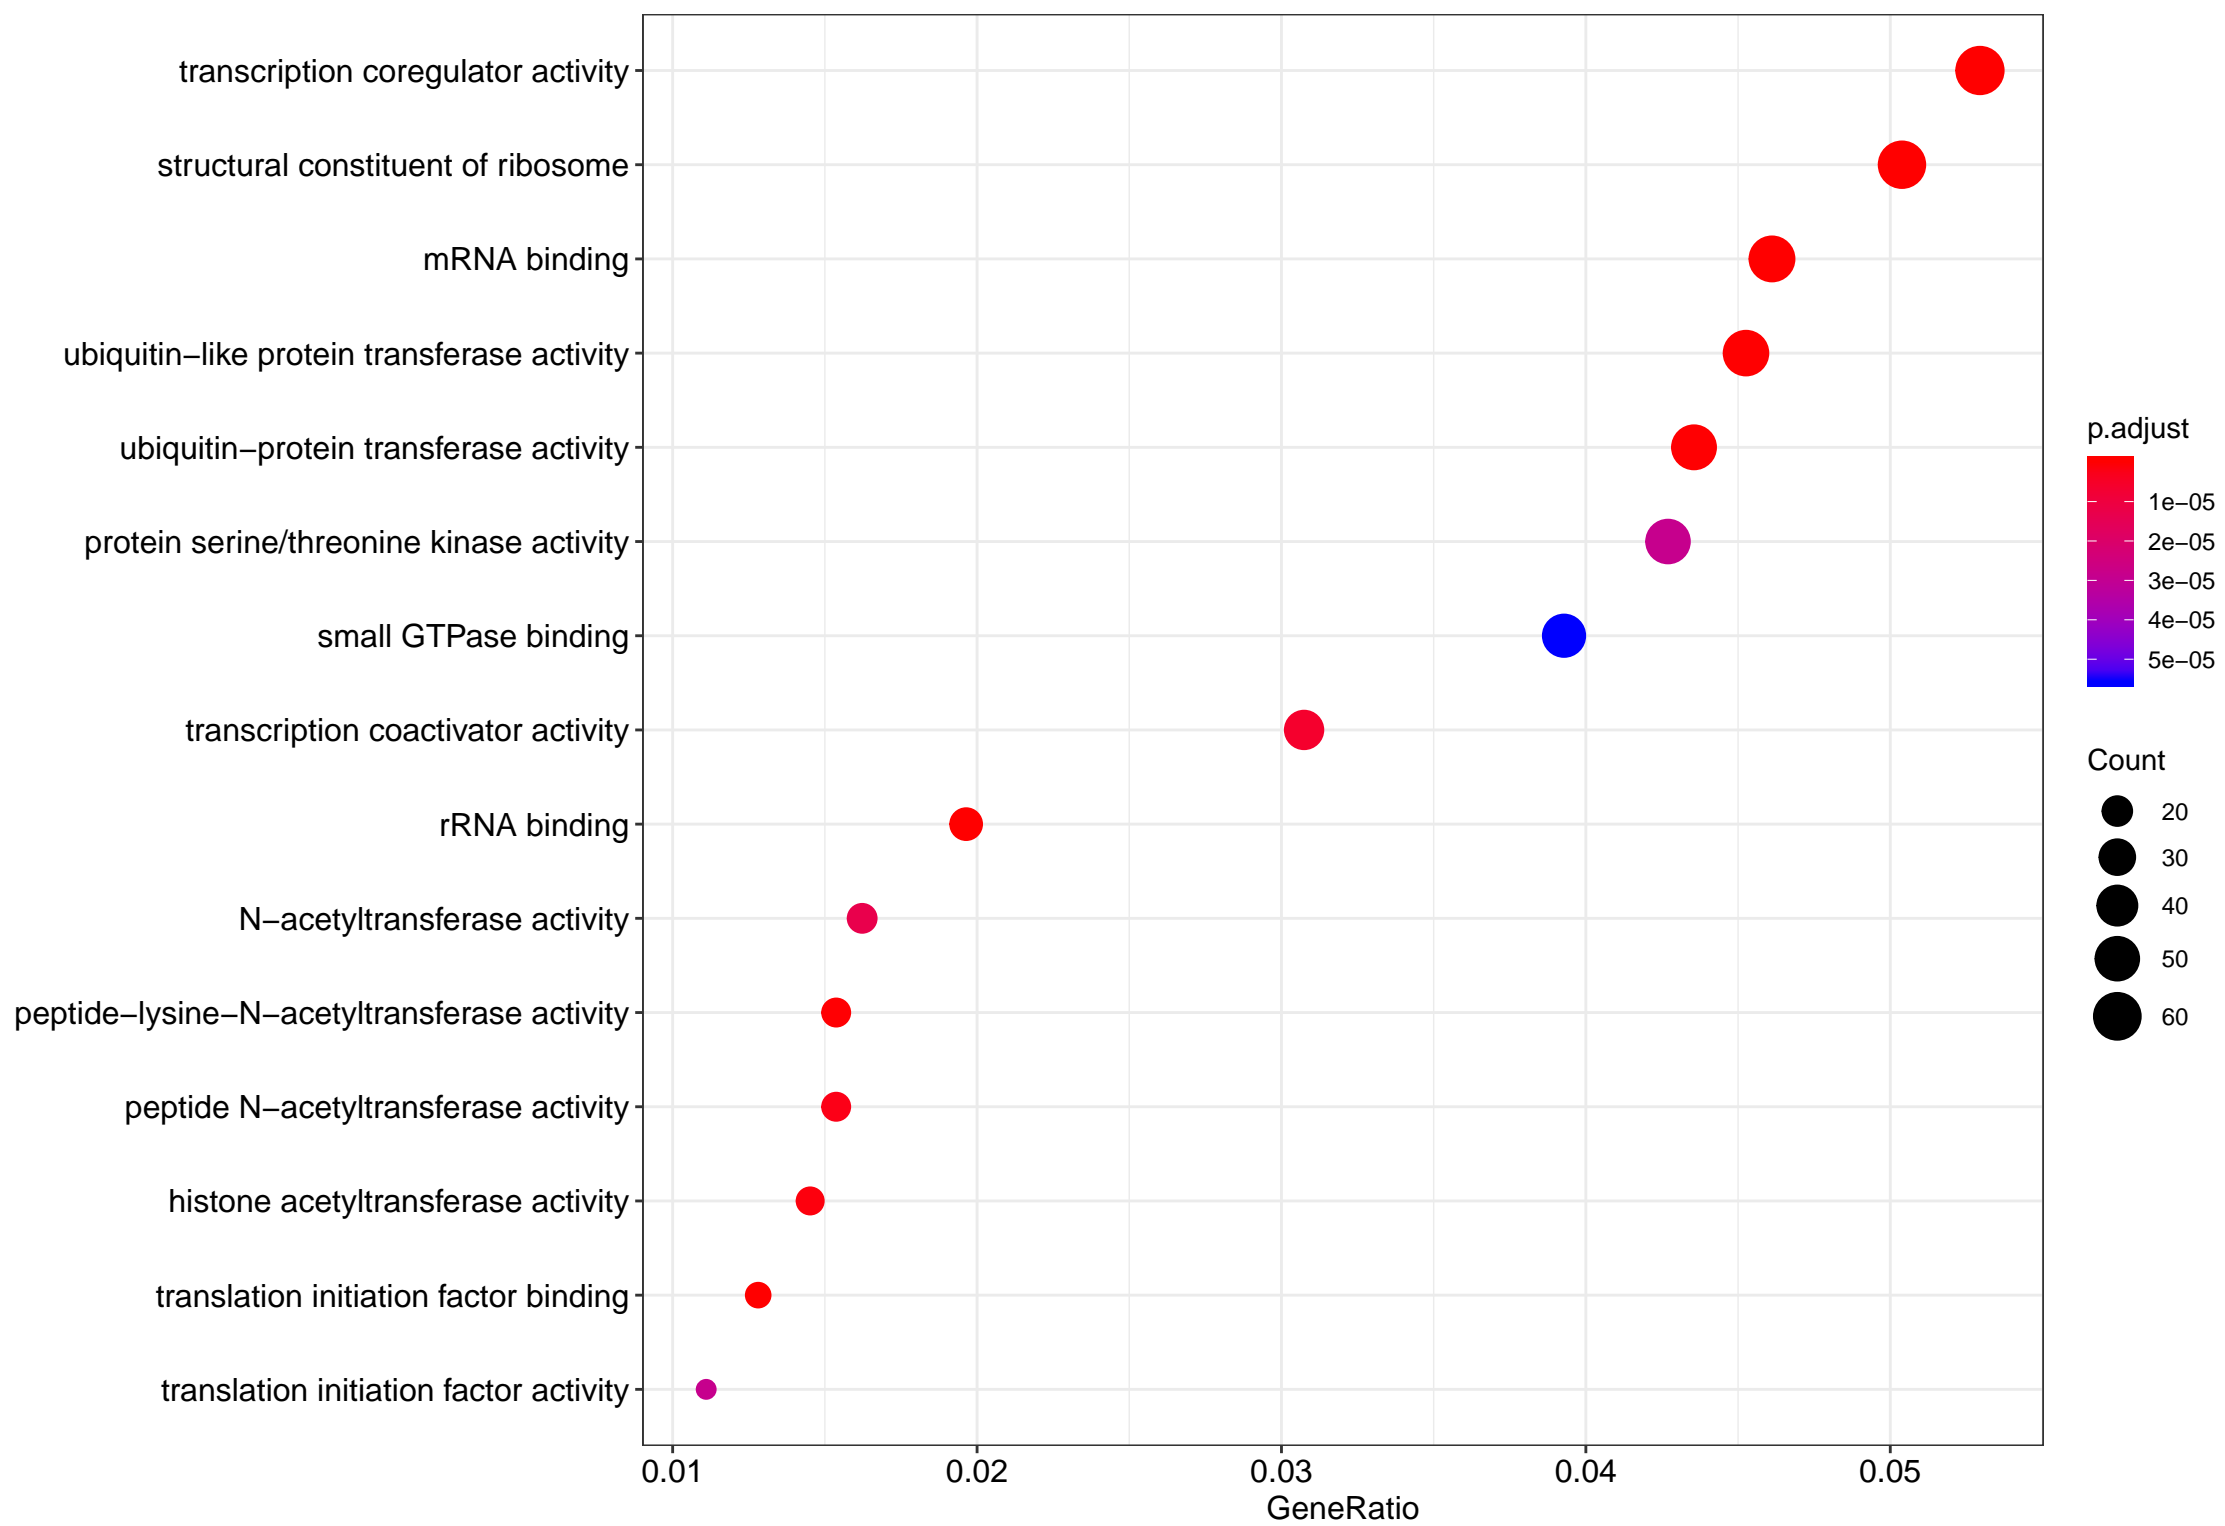

2-cell\_Zygote\_Up\_CC

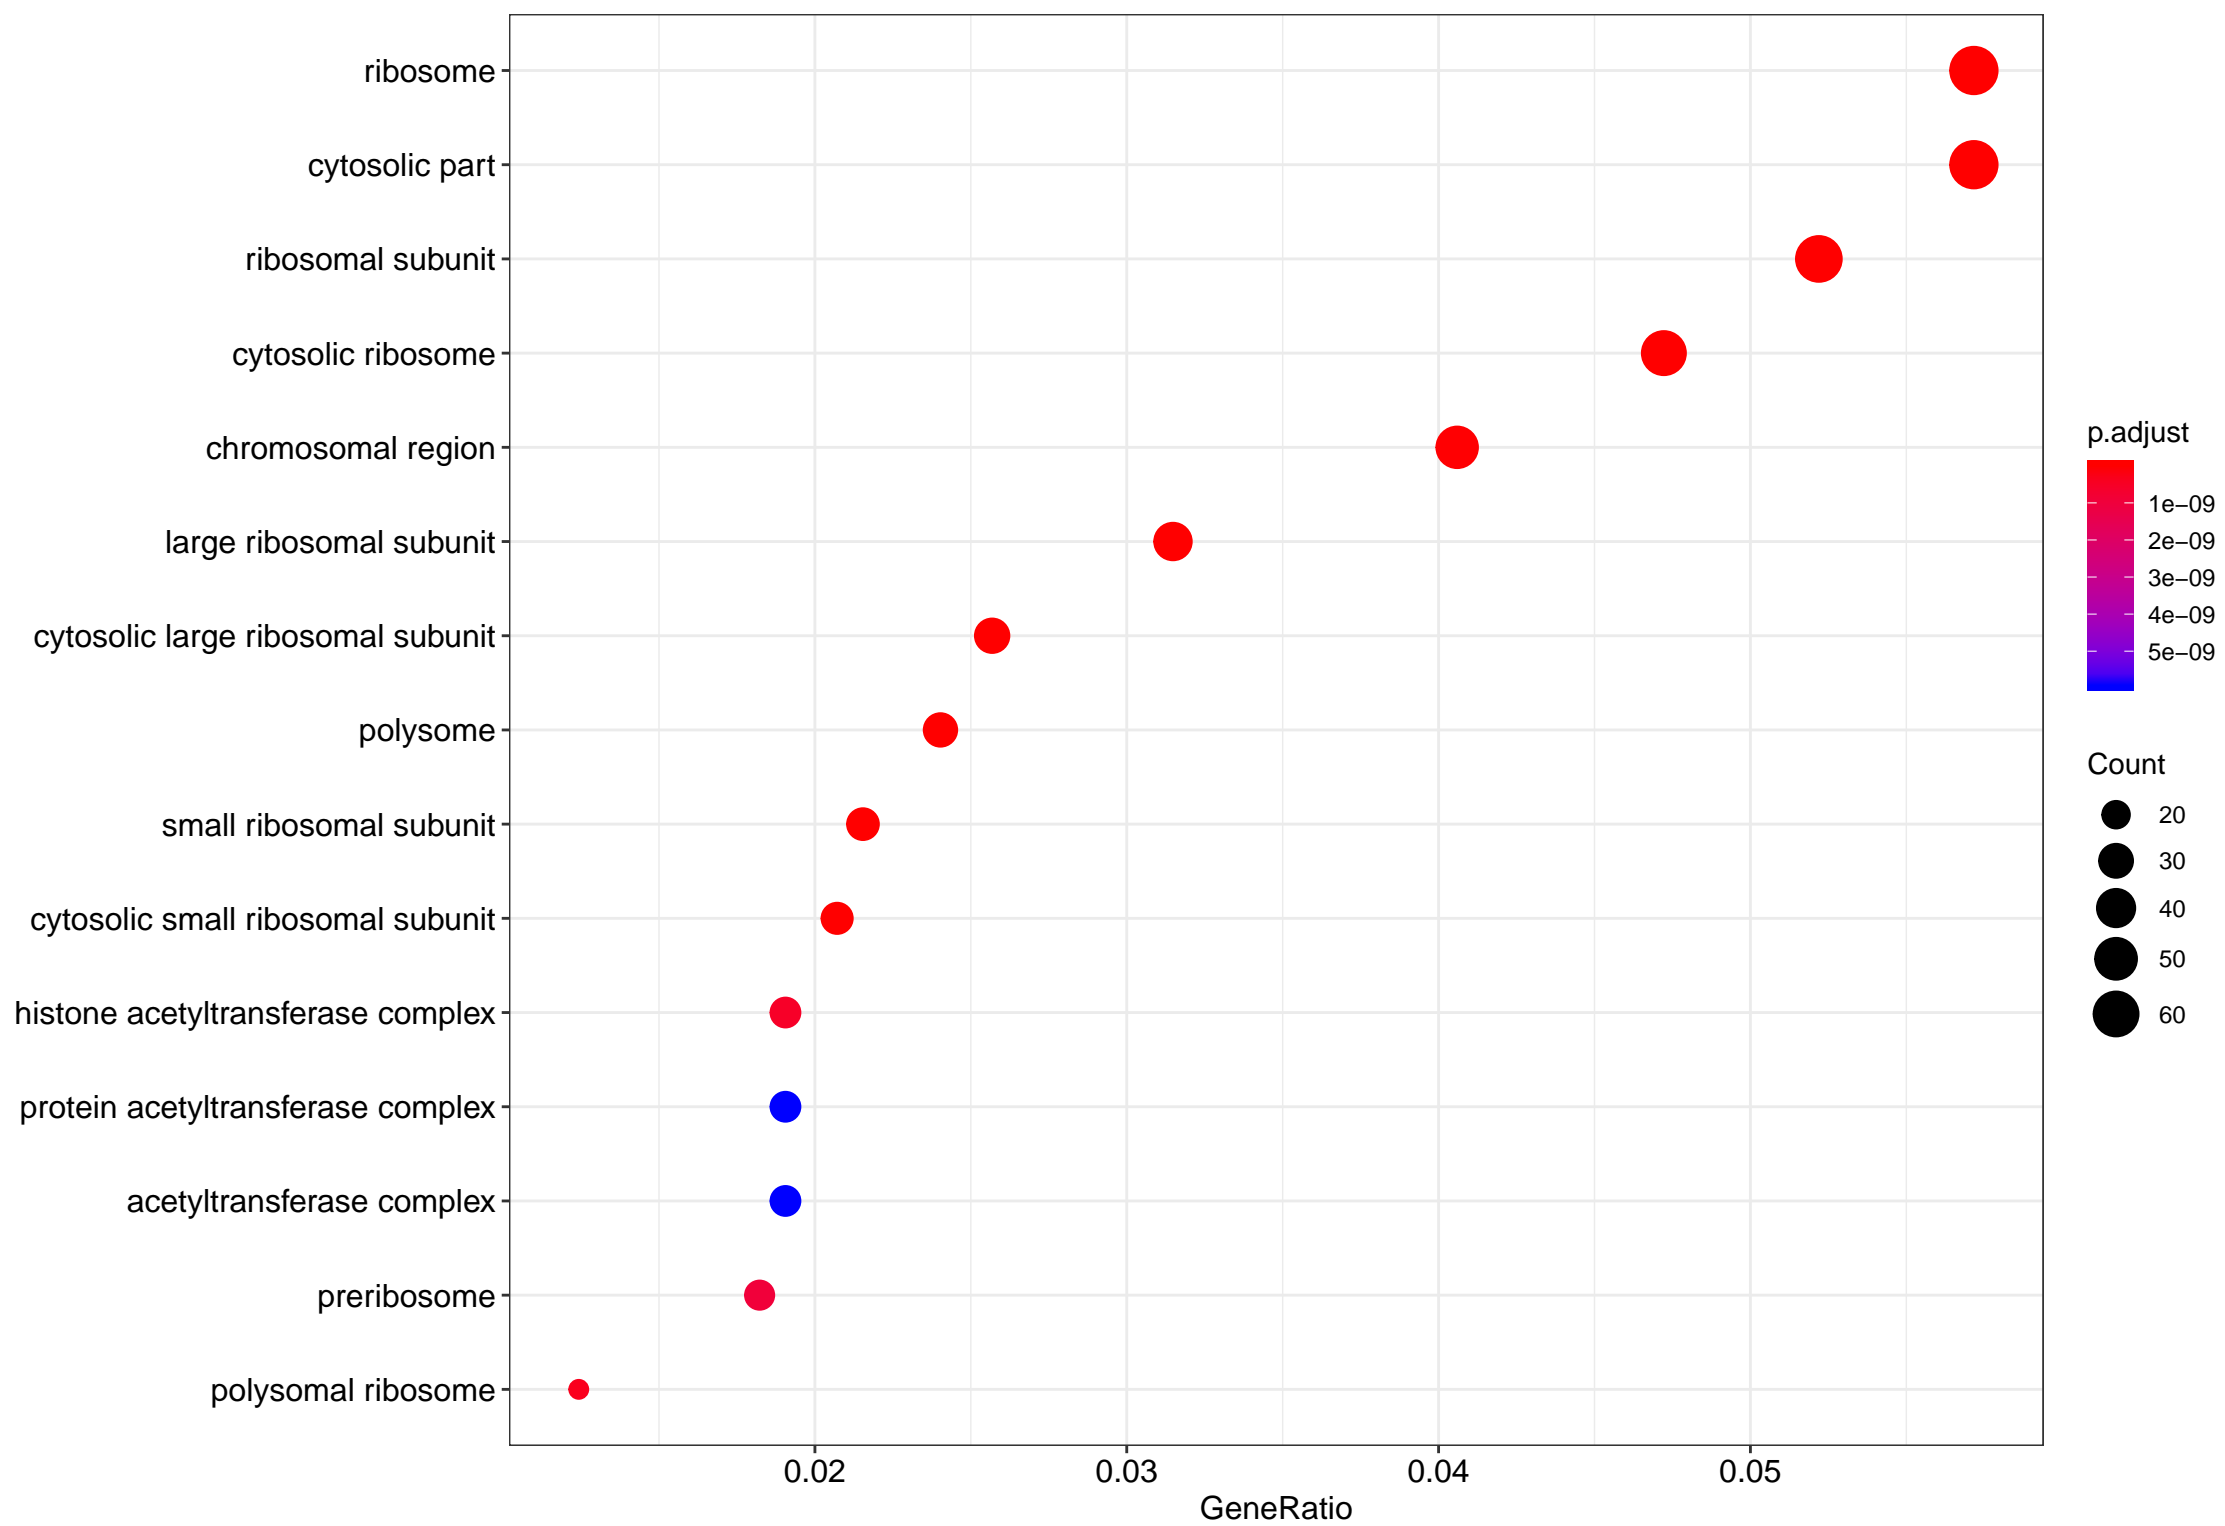

2-cell\_Zygote\_Down\_BP

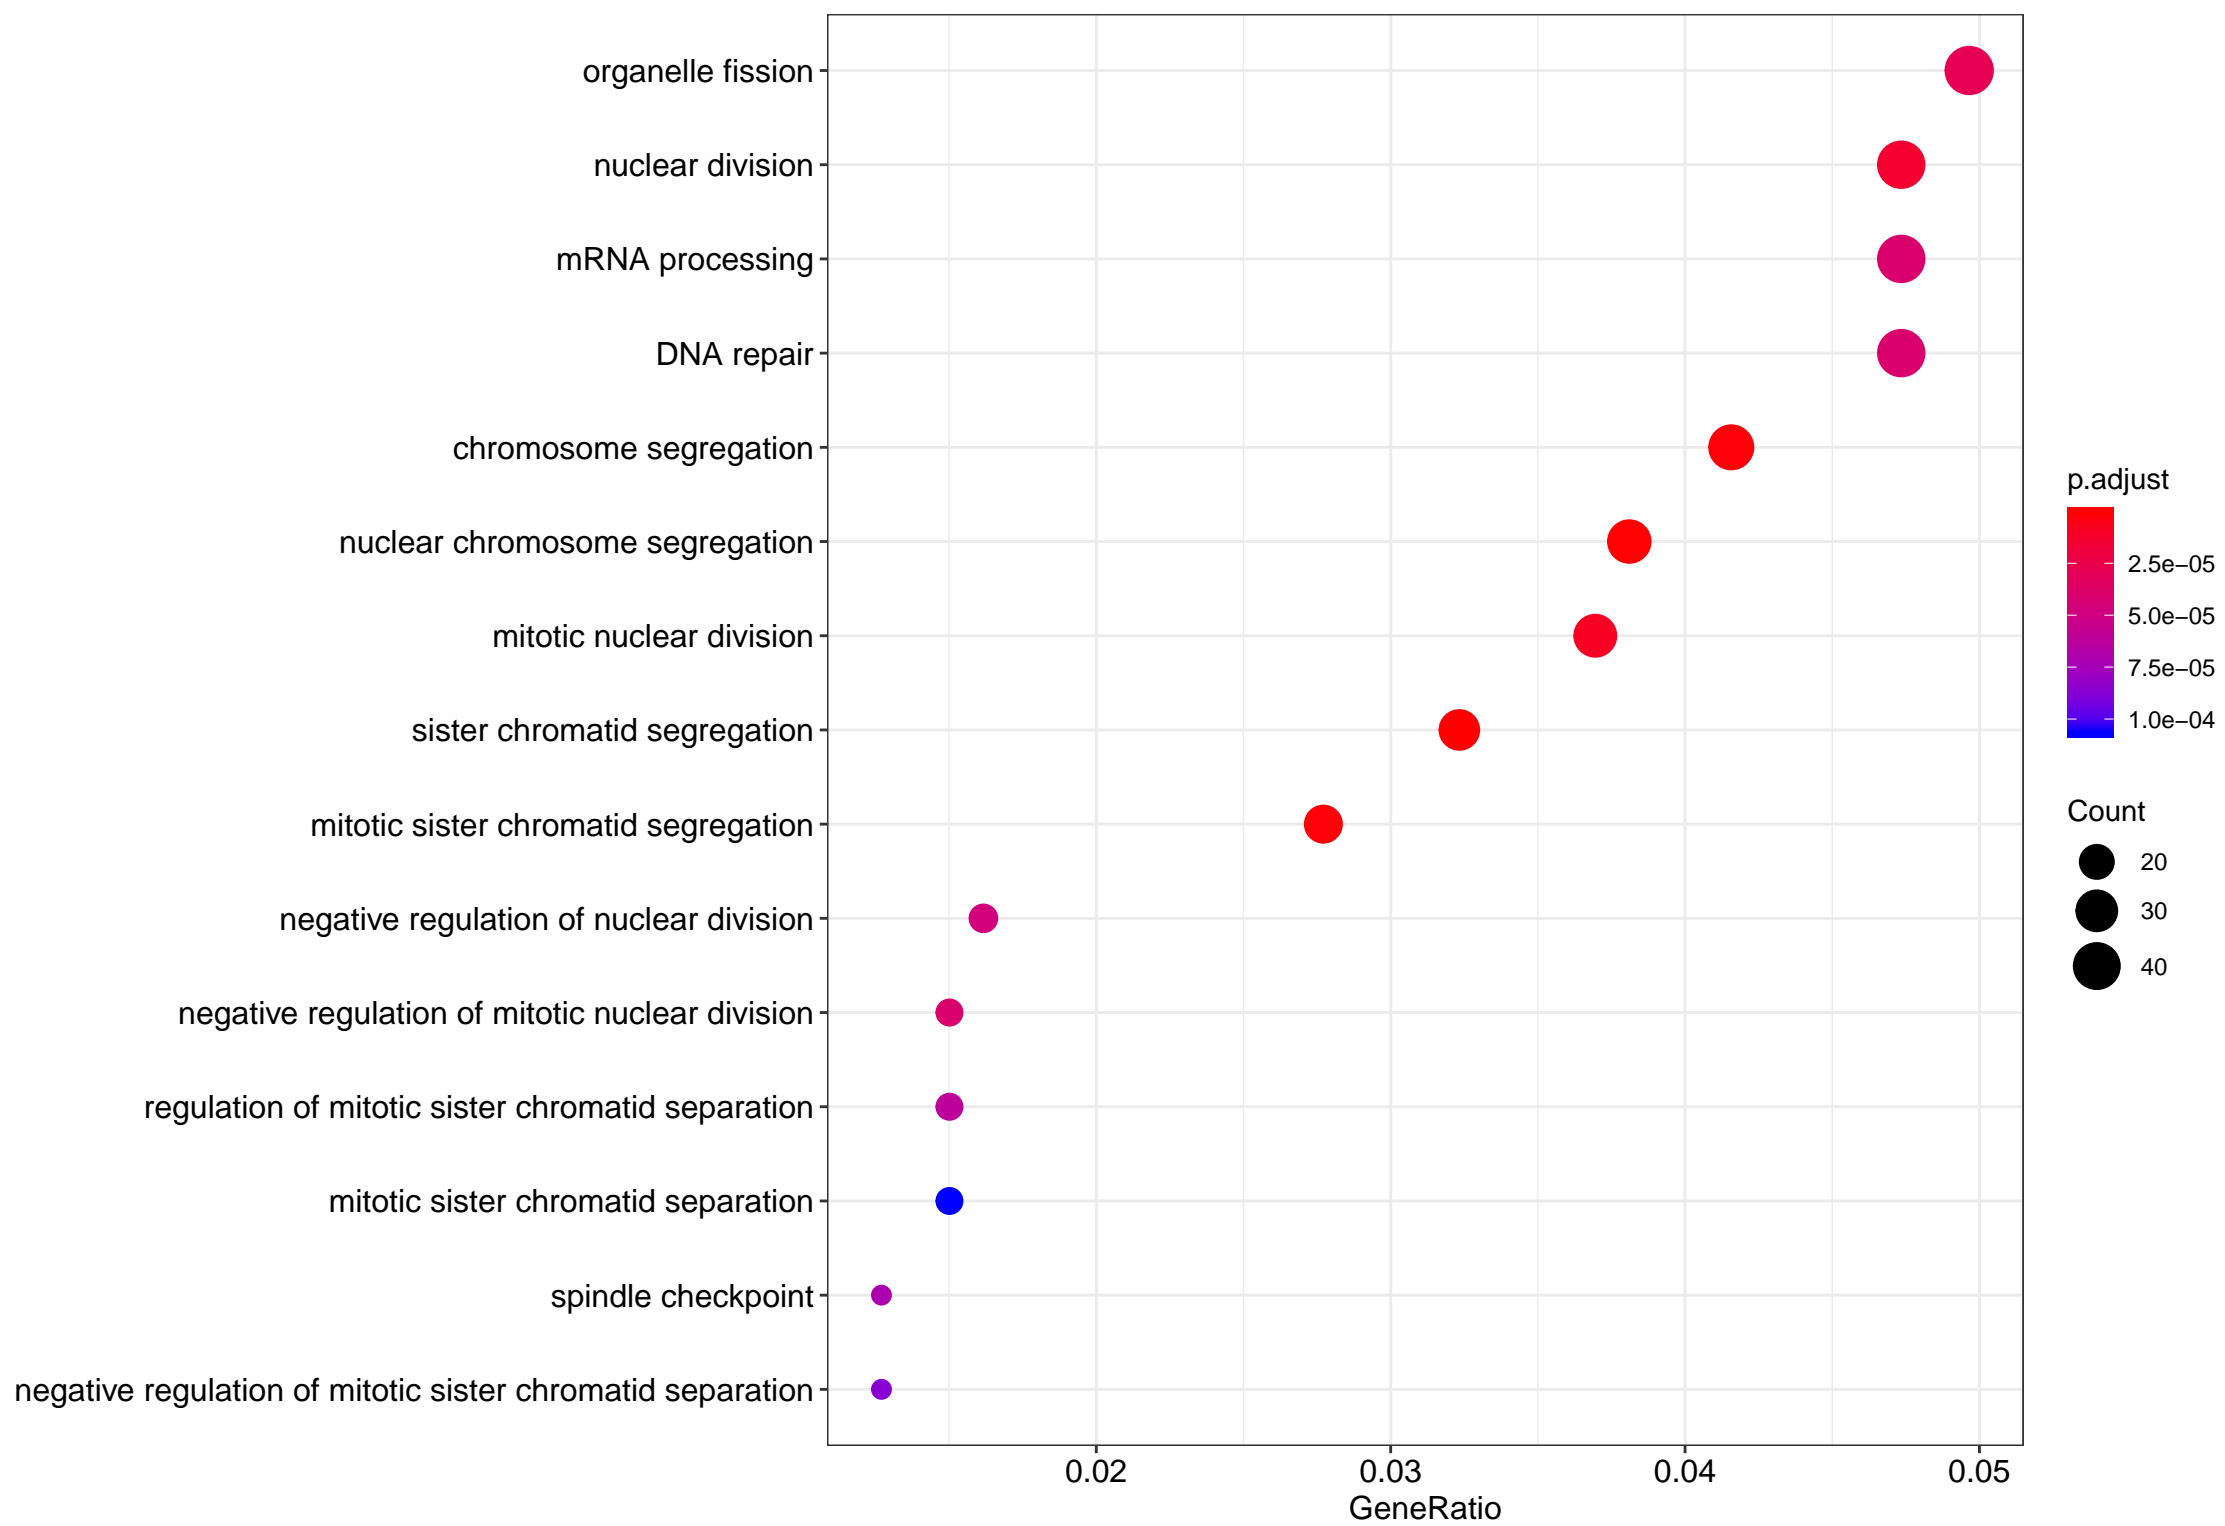

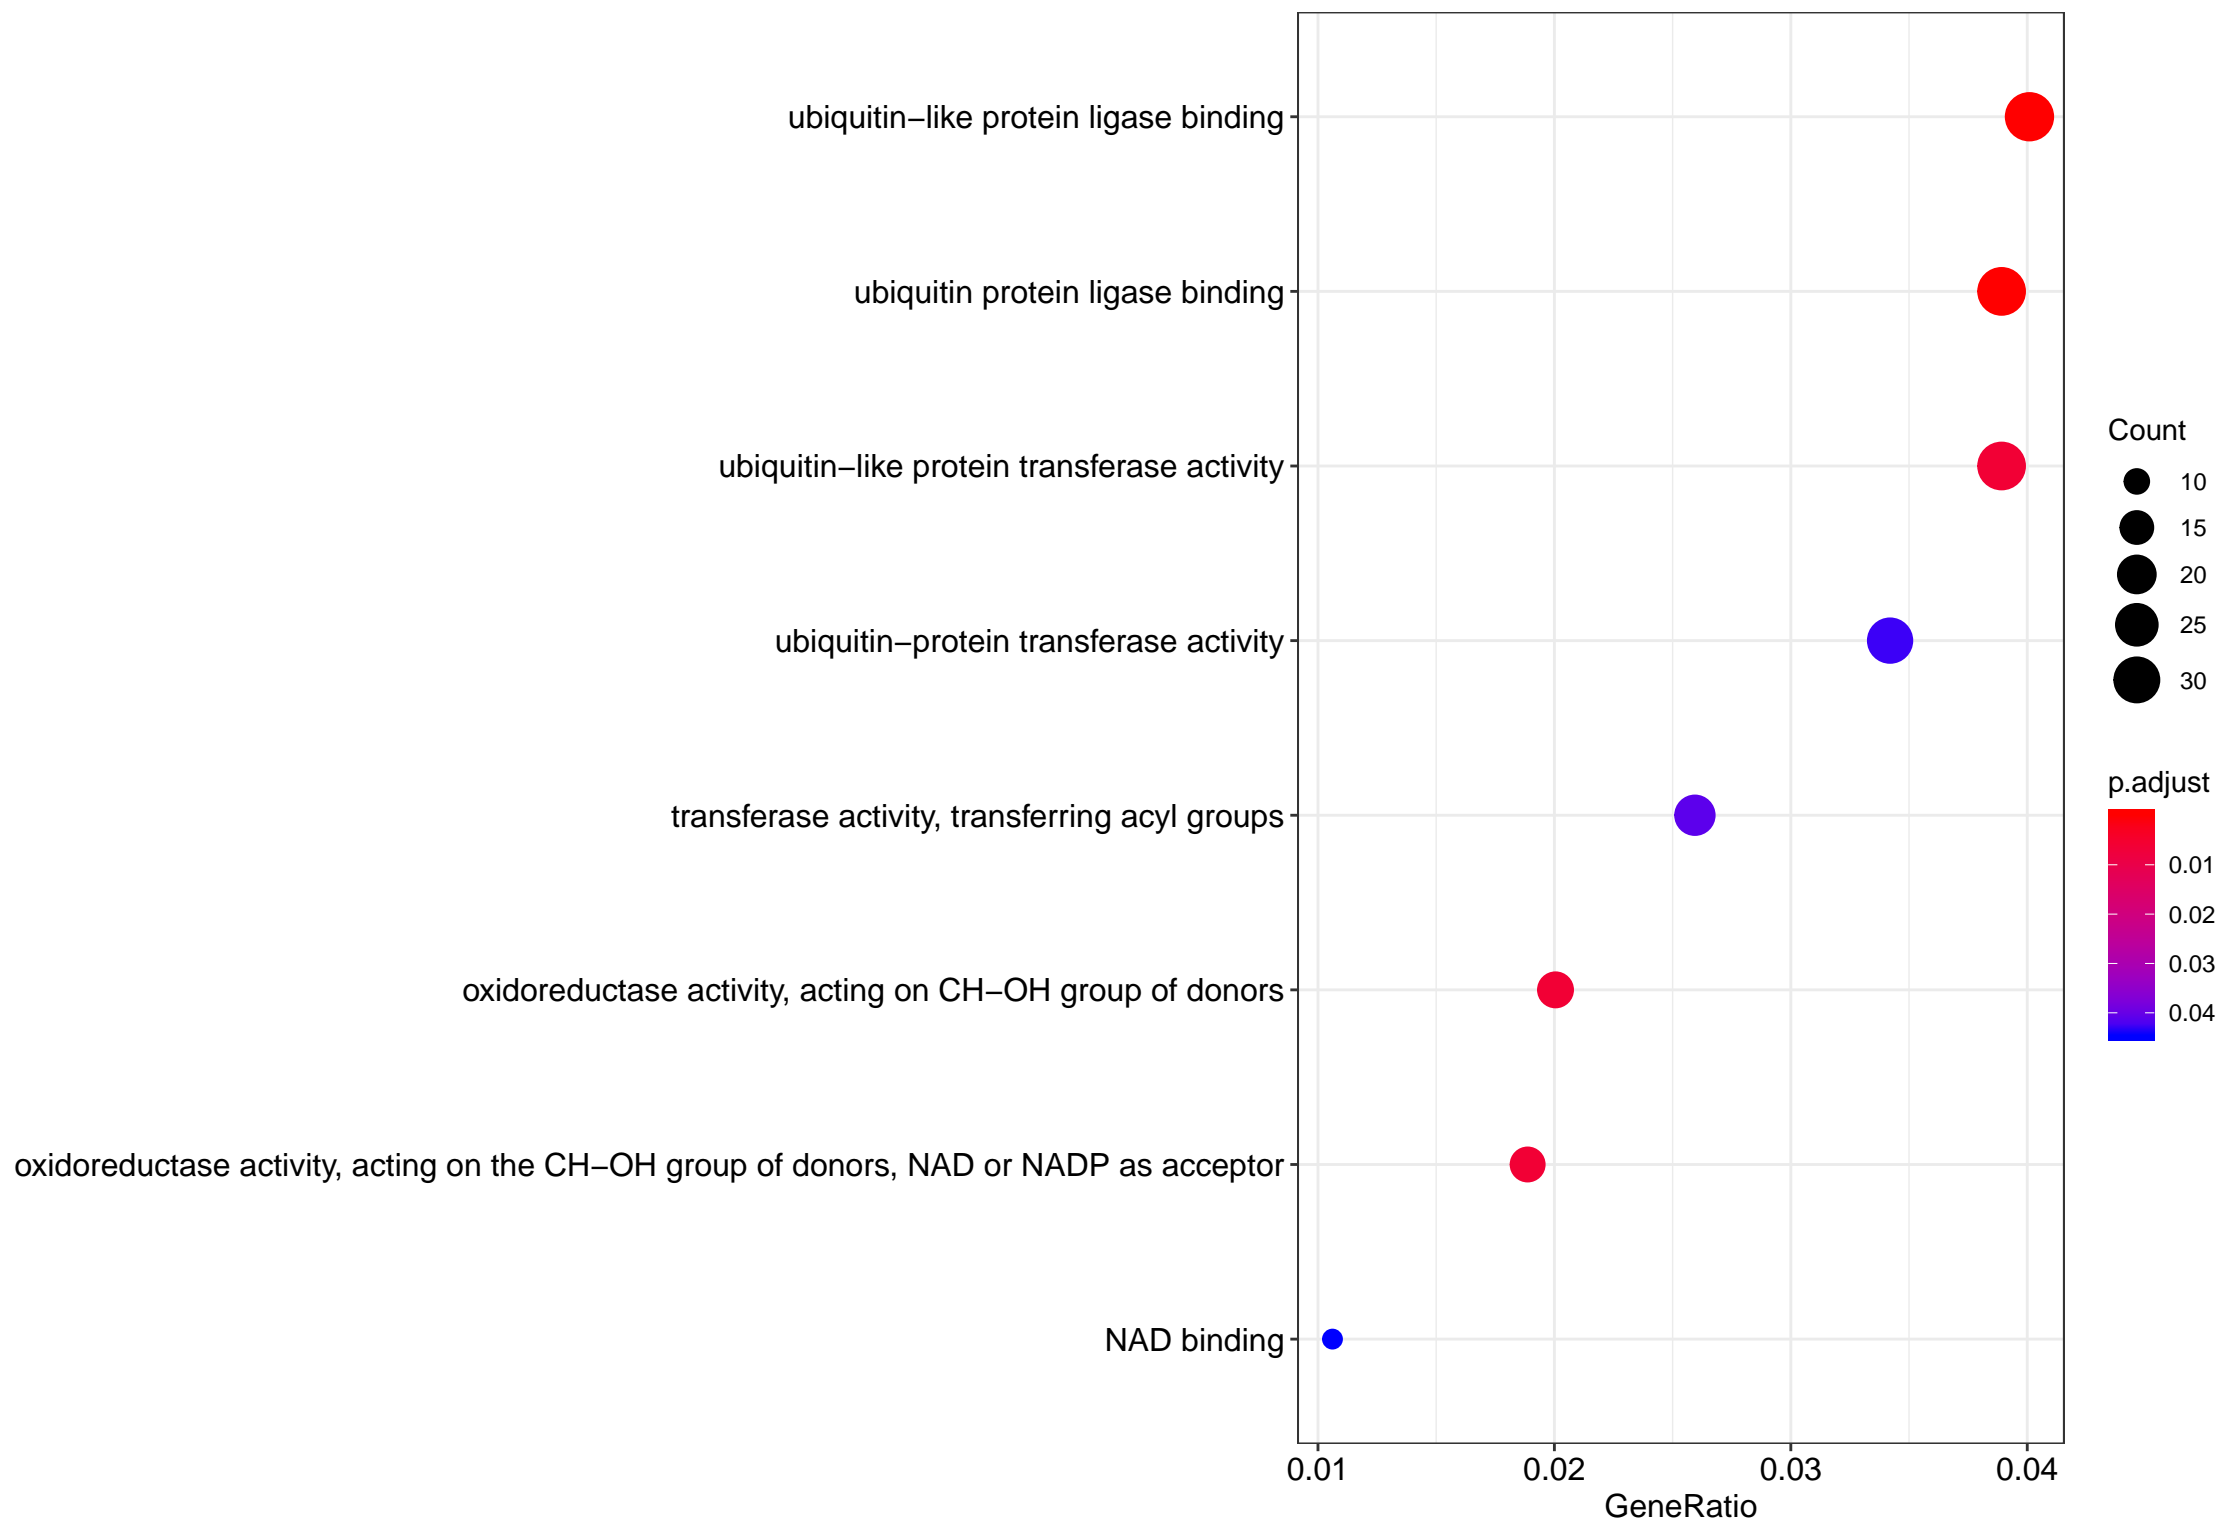

# 2-cell\_Zygote\_Down\_CC

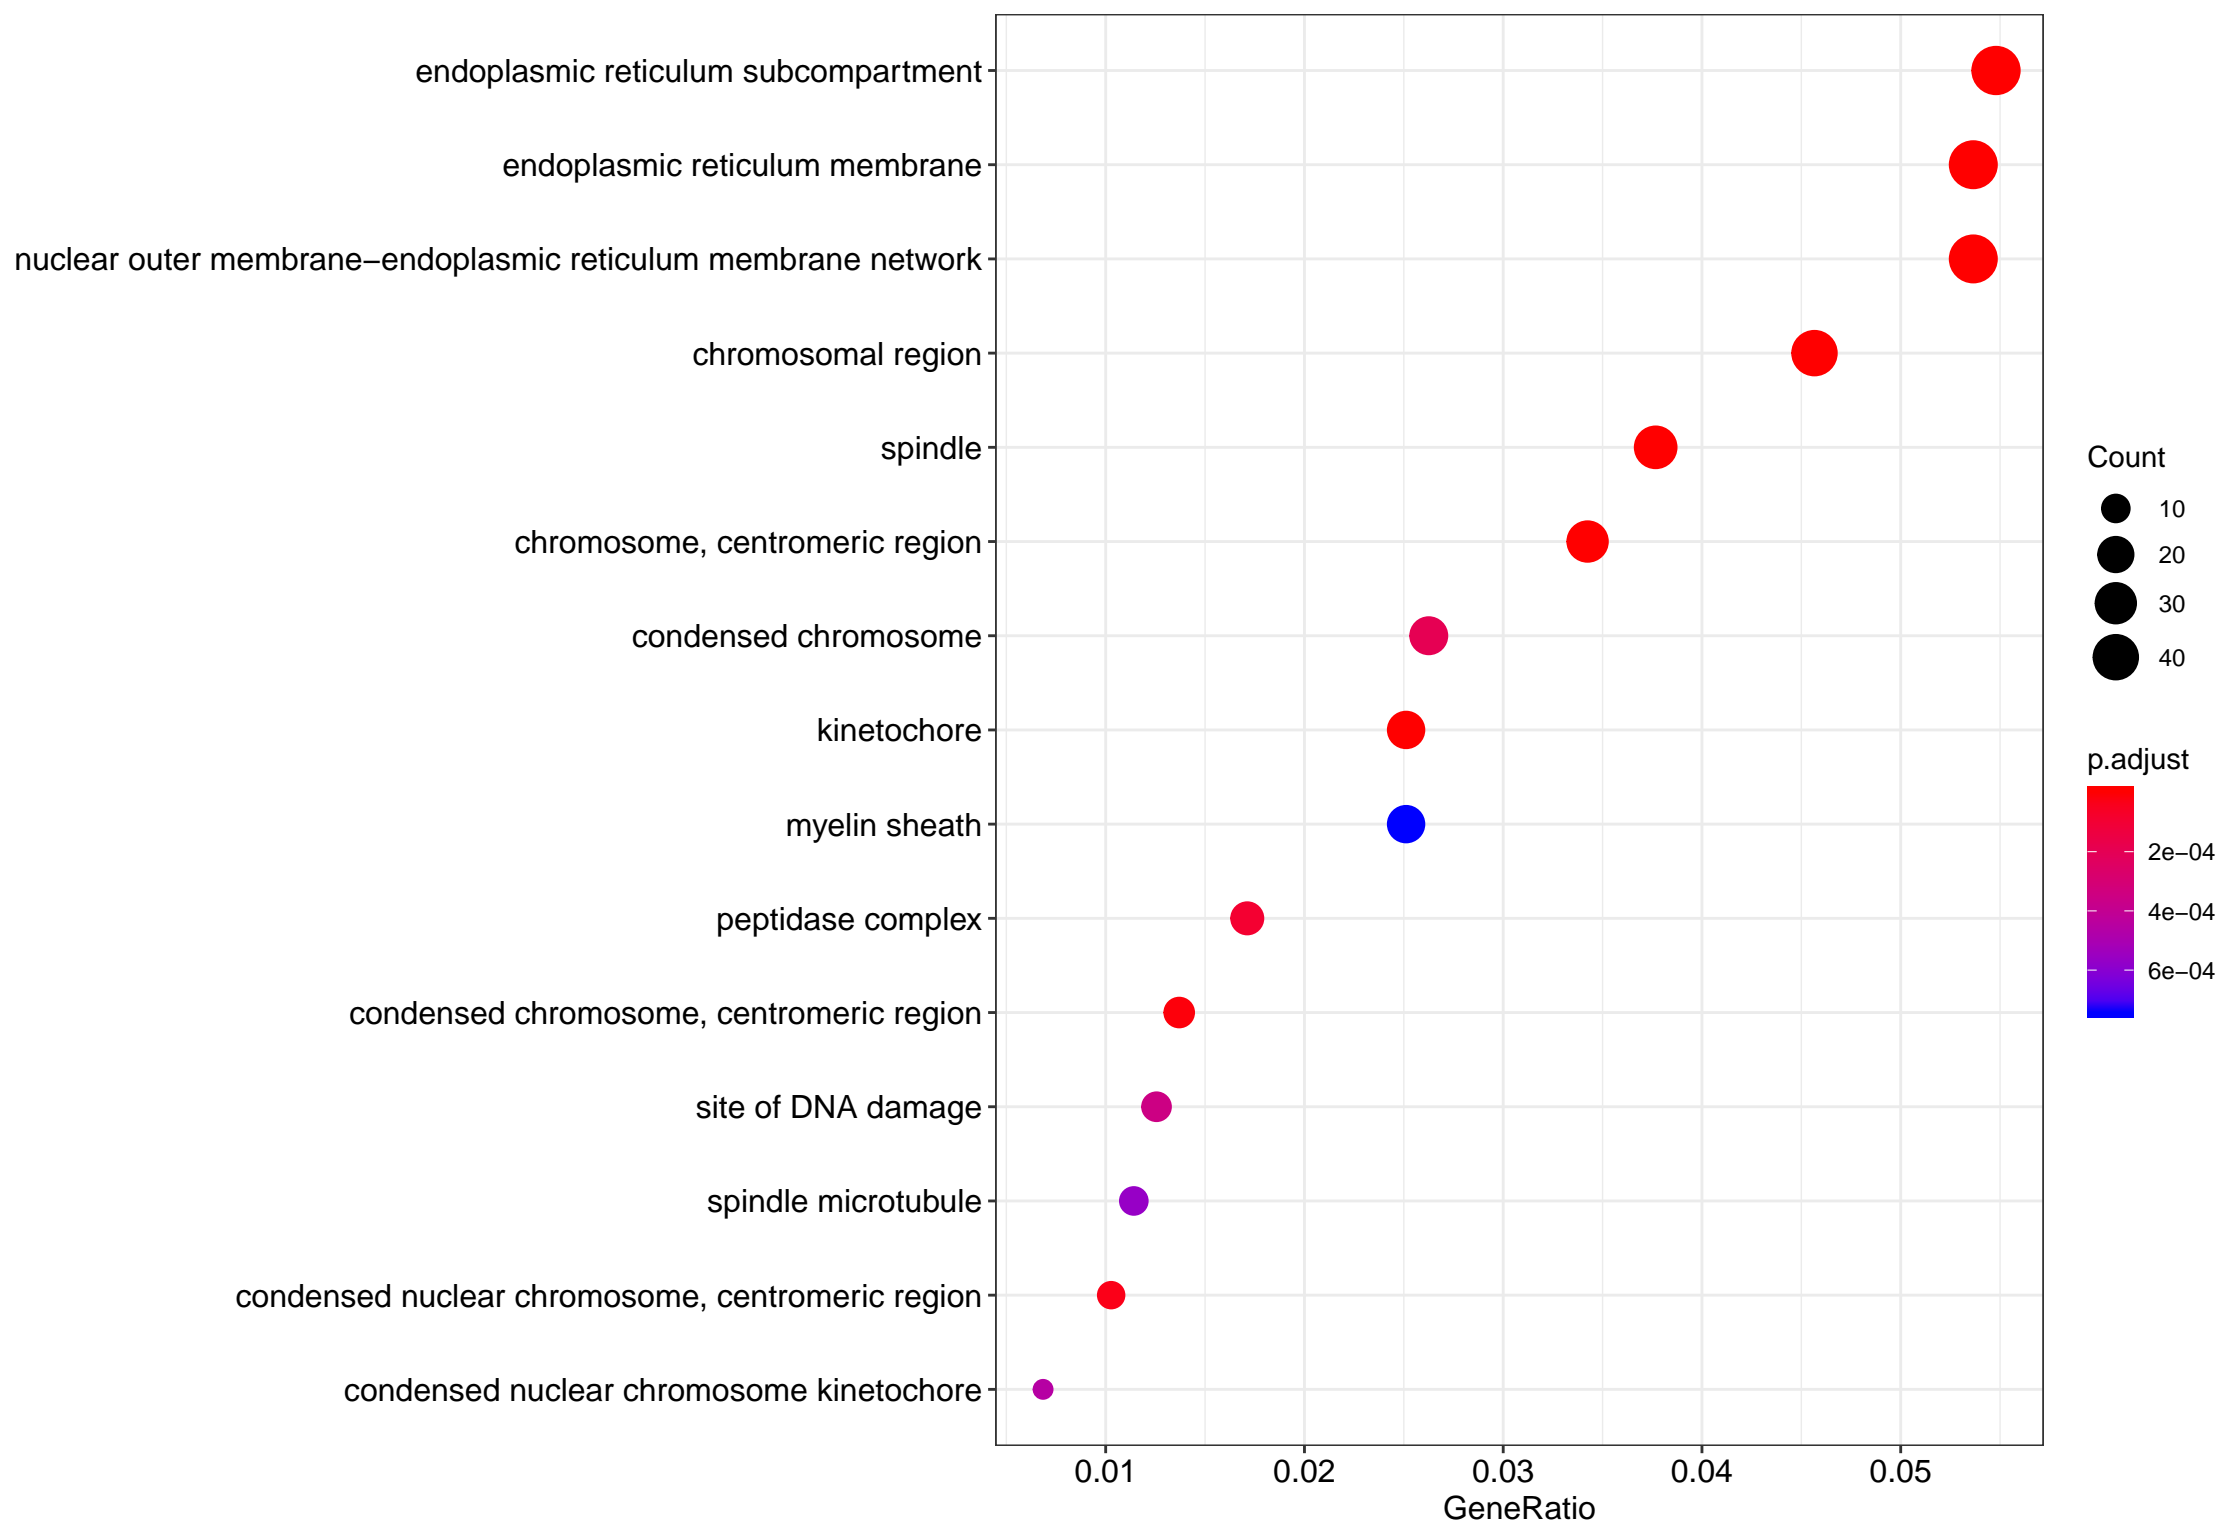

Supplement: Supplementary file [file 21611253]
